# Supplementary material
Source: MDPI journal article supplement (https://www.mdpi.com/2076-3298/11/3/51)
Supplement: s1 [file s1]

# An Effective Biomonitor of Potentially Toxic Elements in Marine Ecosystems: the Brown Alga *Dictyota spiralis*

Maria Antonietta Nitopi <sup>1</sup>, Daniela Baldantoni <sup>1,\*</sup>, Vincenzo Baldi <sup>1</sup>, Floriana Di Stefano <sup>2</sup> and Alessandro Bellino <sup>1</sup>

<sup>1</sup> Dipartimento di Chimica e Biologia "Adolfo Zambelli", Università degli Studi di Salerno,  
Via Giovanni Paolo II, 132-84084 Fisciano (SA), Italy; mnitopi@unisa.it (M.A.N.); vbaldi@unisa.it (V.B.);  
abellino@unisa.it (A.B.)

<sup>2</sup> Consorzio Nazionale Interuniversitario per le Scienze del Mare, Piazzale Flaminio, 9-00196 Roma, Italy;  
floriana.distefano@gmail.com

\* Correspondence: dbaldantoni@unisa.it; Tel.: +39-089-969542

**Table S1.** Macronutrient concentrations (mean values  $\pm$  standard deviations), expressed on a dry weight basis, in the analyzed macrophytes collected from the different sites of the study area (AH: Agropoli Harbor, TB: Trentova Bay, CT: Cape Tresino, CP: Cape Pagliarolo, SM: San Marco, OM: Ogliastro Marina).

| Site | Species               | Ca (mg/g)        | K (mg/g)         | Mg (mg/g)        | P (mg/g)        | S (mg/g)         |
|------|-----------------------|------------------|------------------|------------------|-----------------|------------------|
| AH   | <i>C. elongata</i>    | 24.40 $\pm$ 0.40 | 6.64 $\pm$ 0.04  | 5.52 $\pm$ 0.13  | 0.23 $\pm$ 0.01 | 2.45 $\pm$ 0.04  |
| AH   | <i>D. spiralis</i>    | 9.61 $\pm$ 0.96  | 24.08 $\pm$ 0.19 | 5.01 $\pm$ 0.38  | 0.74 $\pm$ 0.01 | 10.93 $\pm$ 0.07 |
| AH   | <i>P. oceanica</i>    | 3.10 $\pm$ 0.73  | 25.23 $\pm$ 0.85 | 2.60 $\pm$ 0.19  | 0.83 $\pm$ 0.01 | 3.31 $\pm$ 0.04  |
| AH   | <i>U. compressa</i>   | 2.85 $\pm$ 0.53  | 24.61 $\pm$ 0.66 | 4.47 $\pm$ 0.27  | 0.17 $\pm$ 0.06 | 11.06 $\pm$ 0.11 |
| TB   | <i>C. elongata</i>    | 27.70 $\pm$ 1.94 | 2.53 $\pm$ 0.06  | 8.38 $\pm$ 1.47  | 0.11 $\pm$ 0.01 | 2.39 $\pm$ 0.08  |
| TB   | <i>D. spiralis</i>    | 8.20 $\pm$ 1.21  | 25.13 $\pm$ 0.18 | 3.07 $\pm$ 0.15  | 0.34 $\pm$ 0.01 | 6.77 $\pm$ 0.14  |
| TB   | <i>H. virgatum</i>    | 7.85 $\pm$ 1.08  | 17.30 $\pm$ 0.41 | 4.04 $\pm$ 0.30  | 0.24 $\pm$ 0.03 | 4.22 $\pm$ 0.61  |
| TB   | <i>J. rubens</i>      | 31.17 $\pm$ 2.4  | 5.64 $\pm$ 0.14  | 7.96 $\pm$ 0.05  | 0.27 $\pm$ 0.01 | 3.41 $\pm$ 0.08  |
| TB   | <i>P. oceanica</i>    | 6.07 $\pm$ 1.26  | 22.55 $\pm$ 0.30 | 2.24 $\pm$ 0.03  | 0.92 $\pm$ 0.01 | 2.32 $\pm$ 0.05  |
| TB   | <i>U. clathrata</i>   | 0.74 $\pm$ 1.28  | 24.92 $\pm$ 0.58 | 6.75 $\pm$ 0.71  | 0.17 $\pm$ 0.01 | 8.06 $\pm$ 0.21  |
| CT   | <i>C. aerea</i>       | 9.91 $\pm$ 2.13  | 23.30 $\pm$ 0.37 | 2.70 $\pm$ 0.05  | 0.20 $\pm$ 0.01 | 11.73 $\pm$ 0.37 |
| CT   | <i>C. elongata</i>    | 40.92 $\pm$ 5.14 | 0.78 $\pm$ 0.04  | 10.04 $\pm$ 0.33 | 0.10 $\pm$ 0.01 | 2.09 $\pm$ 0.06  |
| CT   | <i>C. compressa</i>   | 7.33 $\pm$ 1.70  | 24.13 $\pm$ 1.20 | 8.35 $\pm$ 1.09  | 0.24 $\pm$ 0.01 | 10.82 $\pm$ 0.11 |
| CT   | <i>C. crinita</i>     | 10.62 $\pm$ 2.39 | 25.60 $\pm$ 0.54 | 5.67 $\pm$ 0.17  | 0.30 $\pm$ 0.02 | 8.01 $\pm$ 0.07  |
| CT   | <i>D. spiralis</i>    | 3.69 $\pm$ 0.84  | 20.14 $\pm$ 0.97 | 2.54 $\pm$ 0.36  | 0.14 $\pm$ 0.01 | 5.87 $\pm$ 0.07  |
| CT   | <i>L. microcladia</i> | 9.33 $\pm$ 3.74  | 24.09 $\pm$ 0.75 | 7.31 $\pm$ 0.24  | 0.19 $\pm$ 0.01 | 19.69 $\pm$ 0.46 |
| CT   | <i>L. obtusa</i>      | 14.74 $\pm$ 1.20 | 22.08 $\pm$ 0.40 | 4.20 $\pm$ 0.19  | 0.12 $\pm$ 0.01 | 11.15 $\pm$ 0.49 |
| CT   | <i>P. oceanica</i>    | 2.31 $\pm$ 0.25  | 25.26 $\pm$ 0.46 | 1.92 $\pm$ 0.04  | 0.58 $\pm$ 0.01 | 3.73 $\pm$ 0.03  |
| CP   | <i>C. elongata</i>    | 5.87 $\pm$ 0.85  | 7.14 $\pm$ 0.25  | 4.19 $\pm$ 0.11  | 0.11 $\pm$ 0.01 | 2.59 $\pm$ 0.02  |
| CP   | <i>C. balearica</i>   | 19.55 $\pm$ 0.22 | 24.60 $\pm$ 0.77 | 2.82 $\pm$ 0.06  | 0.22 $\pm$ 0.01 | 7.50 $\pm$ 0.01  |
| CP   | <i>C. compressa</i>   | 7.13 $\pm$ 0.98  | 23.46 $\pm$ 1.02 | 14.86 $\pm$ 0.92 | 0.28 $\pm$ 0.01 | 21.07 $\pm$ 0.56 |
| CP   | <i>D. spiralis</i>    | 1.60 $\pm$ 0.72  | 19.16 $\pm$ 0.38 | 9.95 $\pm$ 0.10  | 0.16 $\pm$ 0.01 | 10.19 $\pm$ 0.18 |
| CP   | <i>J. rubens</i>      | 32.19 $\pm$ 8.09 | 8.17 $\pm$ 0.15  | 8.07 $\pm$ 0.50  | 0.60 $\pm$ 0.60 | 3.76 $\pm$ 0.40  |
| CP   | <i>L. microcladia</i> | 5.79 $\pm$ 0.08  | 12.68 $\pm$ 0.14 | 2.83 $\pm$ 0.06  | 0.07 $\pm$ 0.01 | 12.36 $\pm$ 0.41 |
| CP   | <i>P. oceanica</i>    | 7.94 $\pm$ 0.23  | 24.17 $\pm$ 1.24 | 3.91 $\pm$ 0.04  | 0.71 $\pm$ 0.01 | 3.08 $\pm$ 0.04  |
| CP   | <i>S. filamentosa</i> | 12.28 $\pm$ 0.99 | 9.99 $\pm$ 0.02  | 15.38 $\pm$ 0.4  | 0.21 $\pm$ 0.01 | 8.49 $\pm$ 0.28  |
| SM   | <i>C. coelothrix</i>  | 12.42 $\pm$ 2.97 | 23.33 $\pm$ 0.14 | 3.07 $\pm$ 0.24  | 0.18 $\pm$ 0.02 | 9.66 $\pm$ 1.01  |
| SM   | <i>C. compressa</i>   | 3.39 $\pm$ 0.53  | 23.94 $\pm$ 0.71 | 5.01 $\pm$ 0.12  | 0.20 $\pm$ 0.01 | 12.59 $\pm$ 0.08 |
| SM   | <i>D. spiralis</i>    | 5.25 $\pm$ 0.39  | 23.59 $\pm$ 1.29 | 1.96 $\pm$ 0.01  | 0.12 $\pm$ 0.01 | 7.19 $\pm$ 0.10  |
| SM   | <i>J. rubens</i>      | 33.32 $\pm$ 4.06 | 7.16 $\pm$ 0.17  | 2.96 $\pm$ 0.30  | 0.25 $\pm$ 0.01 | 3.72 $\pm$ 0.13  |
| SM   | <i>L. microcladia</i> | 10.11 $\pm$ 1.56 | 23.19 $\pm$ 0.93 | 6.05 $\pm$ 0.19  | 0.34 $\pm$ 0.01 | 27.3 $\pm$ 0.40  |
| SM   | <i>P. oceanica</i>    | 3.27 $\pm$ 0.52  | 25.59 $\pm$ 0.39 | 2.36 $\pm$ 0.53  | 0.59 $\pm$ 0.01 | 2.87 $\pm$ 0.03  |
| SM   | <i>T. atomaria</i>    | 2.98 $\pm$ 0.47  | 24.61 $\pm$ 0.98 | 4.21 $\pm$ 0.26  | 0.24 $\pm$ 0.01 | 9.87 $\pm$ 0.11  |
| OM   | <i>C. spinosa</i>     | 11.18 $\pm$ 0.31 | 24.59 $\pm$ 0.13 | 5.97 $\pm$ 0.42  | 0.30 $\pm$ 0.02 | 8.81 $\pm$ 0.14  |
| OM   | <i>J. rubens</i>      | 15.05 $\pm$ 0.44 | 13.59 $\pm$ 0.40 | 4.62 $\pm$ 0.46  | 0.19 $\pm$ 0.01 | 3.07 $\pm$ 0.01  |
| OM   | <i>L. microcladia</i> | 10.41 $\pm$ 0.59 | 21.94 $\pm$ 0.42 | 3.14 $\pm$ 0.22  | 0.48 $\pm$ 0.02 | 25.96 $\pm$ 0.28 |
| OM   | <i>P. oceanica</i>    | 7.45 $\pm$ 0.11  | 24.70 $\pm$ 0.32 | 5.31 $\pm$ 0.06  | 0.56 $\pm$ 0.01 | 3.42 $\pm$ 0.03  |

**Table S2.** Micronutrient concentrations (mean values  $\pm$  standard deviations), expressed on a dry weight basis, in the analyzed macrophytes collected from the different sites of the study area (AH: Agropoli Harbor, TB: Trentova Bay, CT: Cape Tresino, CP: Cape Pagliarolo, SM: San Marco, OM: Ogliastro Marina).

| Site | Species               | Cr ( $\mu\text{g/g}$ ) | Cu ( $\mu\text{g/g}$ ) | Fe ( $\mu\text{g/g}$ ) | Mn ( $\mu\text{g/g}$ ) | Ni ( $\mu\text{g/g}$ ) | V ( $\mu\text{g/g}$ ) | Zn ( $\mu\text{g/g}$ ) |
|------|-----------------------|------------------------|------------------------|------------------------|------------------------|------------------------|-----------------------|------------------------|
| AH   | <i>C. elongata</i>    | < 0.01                 | 5.67 $\pm$ 0.53        | 22.93 $\pm$ 4.09       | 13.40 $\pm$ 1.57       | 1.08 $\pm$ 0.09        | 3.73 $\pm$ 0.46       | 25.28 $\pm$ 6.58       |
| AH   | <i>D. spiralis</i>    | 9.85 $\pm$ 1.09        | 24.73 $\pm$ 0.23       | 806.24 $\pm$ 18.09     | 104.38 $\pm$ 0.70      | 8.42 $\pm$ 0.49        | 3.59 $\pm$ 0.16       | 37.69 $\pm$ 0.96       |
| AH   | <i>P. oceanica</i>    | 1.28 $\pm$ 0.32        | 126.29 $\pm$ 1.18      | 350.26 $\pm$ 21.51     | 154.80 $\pm$ 0.43      | 28.30 $\pm$ 0.19       | 1.94 $\pm$ 0.10       | 103.35 $\pm$ 1.55      |
| AH   | <i>U. compressa</i>   | 12.20 $\pm$ 1.27       | 10.77 $\pm$ 0.7        | 471.35 $\pm$ 12.32     | 8.32 $\pm$ 1.50        | 2.37 $\pm$ 0.60        | 3.27 $\pm$ 0.37       | 3.16 $\pm$ 0.34        |
| TB   | <i>C. elongata</i>    | < 0.01                 | 3.05 $\pm$ 2.66        | 16.71 $\pm$ 4.56       | 47.32 $\pm$ 7.63       | 2.93 $\pm$ 0.59        | 1.66 $\pm$ 0.27       | 5.92 $\pm$ 0.16        |
| TB   | <i>D. spiralis</i>    | 4.27 $\pm$ 0.62        | 6.58 $\pm$ 0.51        | 419.69 $\pm$ 48.81     | 11.20 $\pm$ 0.52       | 1.66 $\pm$ 0.13        | 1.95 $\pm$ 0.11       | 10.47 $\pm$ 0.27       |
| TB   | <i>H. virgatum</i>    | 2.64 $\pm$ 0.41        | 5.83 $\pm$ 0.58        | 240.29 $\pm$ 15.58     | 41.56 $\pm$ 1.52       | 2.66 $\pm$ 0.27        | 4.33 $\pm$ 0.14       | < 0.40                 |
| TB   | <i>J. rubens</i>      | < 0.01                 | 3.66 $\pm$ 0.3         | 35.15 $\pm$ 8.73       | 35.84 $\pm$ 5.08       | 2.59 $\pm$ 0.37        | 1.16 $\pm$ 0.34       | 16.55 $\pm$ 1.44       |
| TB   | <i>P. oceanica</i>    | 0.03 $\pm$ 0.06        | 59.53 $\pm$ 0.74       | 135.47 $\pm$ 7.77      | 197.99 $\pm$ 2.72      | 46.07 $\pm$ 0.81       | 0.84 $\pm$ 0.08       | 59.39 $\pm$ 4.27       |
| TB   | <i>U. clathrata</i>   | 38.37 $\pm$ 8.89       | 10.27 $\pm$ 0.39       | 1641.02 $\pm$ 615.96   | 30.34 $\pm$ 3.61       | 6.77 $\pm$ 0.49        | 10.14 $\pm$ 0.61      | 1.68 $\pm$ 2.92        |
| CT   | <i>C. aerea</i>       | 11.27 $\pm$ 1.81       | 6.00 $\pm$ 0.35        | 520.90 $\pm$ 53.02     | 11.62 $\pm$ 0.11       | 5.20 $\pm$ 0.21        | 3.73 $\pm$ 0.09       | 3.29 $\pm$ 0.28        |
| CT   | <i>C. elongata</i>    | 4.82 $\pm$ 8.34        | 3.73 $\pm$ 0.27        | 30.22 $\pm$ 37.22      | 36.87 $\pm$ 1.78       | 1.28 $\pm$ 0.10        | 1.56 $\pm$ 0.09       | 7.03 $\pm$ 0.69        |
| CT   | <i>C. compressa</i>   | 3.02 $\pm$ 1.78        | 5.53 $\pm$ 0.56        | 66.20 $\pm$ 0.05       | 6.80 $\pm$ 0.08        | 3.80 $\pm$ 0.70        | 2.94 $\pm$ 0.31       | 12.41 $\pm$ 0.66       |
| CT   | <i>C. crinita</i>     | 0.48 $\pm$ 0.10        | 7.06 $\pm$ 0.2         | 161.39 $\pm$ 22.50     | 19.12 $\pm$ 0.62       | 3.03 $\pm$ 0.09        | 21.69 $\pm$ 0.49      | 8.61 $\pm$ 0.14        |
| CT   | <i>D. spiralis</i>    | 4.91 $\pm$ 0.70        | 6.02 $\pm$ 0.65        | 537.92 $\pm$ 42.41     | 16.12 $\pm$ 2.24       | 3.76 $\pm$ 0.17        | 2.62 $\pm$ 0.14       | < 0.40                 |
| CT   | <i>L. microcladia</i> | 1.07 $\pm$ 0.36        | 7.76 $\pm$ 0.34        | 92.81 $\pm$ 3.18       | 14.06 $\pm$ 2.25       | 3.01 $\pm$ 0.02        | 6.27 $\pm$ 0.74       | 9.75 $\pm$ 0.67        |
| CT   | <i>L. obtusa</i>      | 3.68 $\pm$ 0.34        | 13.84 $\pm$ 3.27       | 166.01 $\pm$ 7.95      | 44.98 $\pm$ 0.69       | 9.73 $\pm$ 1.00        | 15.29 $\pm$ 0.12      | 17.77 $\pm$ 1.46       |
| CT   | <i>P. oceanica</i>    | 0.75 $\pm$ 0.17        | 53.13 $\pm$ 1.98       | 174.29 $\pm$ 3.10      | 43.16 $\pm$ 0.40       | 31.83 $\pm$ 0.58       | 0.70 $\pm$ 0.11       | 44.15 $\pm$ 0.75       |
| CP   | <i>C. elongata</i>    | < 0.01                 | 3.87 $\pm$ 0.23        | 15.42 $\pm$ 5.47       | 14.79 $\pm$ 1.64       | 2.07 $\pm$ 0.19        | 4.93 $\pm$ 0.81       | < 0.40                 |
| CP   | <i>C. balearica</i>   | 2.13 $\pm$ 0.10        | 11.00 $\pm$ 1.99       | 244.63 $\pm$ 8.08      | 28.62 $\pm$ 0.18       | 5.18 $\pm$ 0.31        | 24.75 $\pm$ 0.12      | 9.25 $\pm$ 0.86        |
| CP   | <i>C. compressa</i>   | 1.22 $\pm$ 0.05        | 6.95 $\pm$ 2.05        | 71.35 $\pm$ 4.04       | 8.31 $\pm$ 0.99        | 4.91 $\pm$ 0.73        | 1.06 $\pm$ 0.02       | 7.63 $\pm$ 0.08        |
| CP   | <i>D. spiralis</i>    | 4.15 $\pm$ 0.49        | 5.79 $\pm$ 0.13        | 472.99 $\pm$ 23.89     | 6.40 $\pm$ 0.42        | 2.81 $\pm$ 0.19        | 4.36 $\pm$ 0.15       | < 0.40                 |
| CP   | <i>J. rubens</i>      | 0.91 $\pm$ 1.34        | 5.03 $\pm$ 4.47        | 239.35 $\pm$ 103.04    | 32.83 $\pm$ 28.43      | 1.78 $\pm$ 1.58        | 3.17 $\pm$ 2.82       | 19.01 $\pm$ 0.09       |
| CP   | <i>L. microcladia</i> | 1.56 $\pm$ 0.59        | 14.05 $\pm$ 0.97       | 133.77 $\pm$ 4.62      | 24.64 $\pm$ 1.06       | 5.48 $\pm$ 0.62        | 7.16 $\pm$ 0.21       | 7.63 $\pm$ 0.09        |
| CP   | <i>P. oceanica</i>    | 0.55 $\pm$ 0.40        | 52.17 $\pm$ 1.19       | 96.31 $\pm$ 4.23       | 203.89 $\pm$ 2.54      | 48.34 $\pm$ 0.12       | 0.67 $\pm$ 0.04       | 72.25 $\pm$ 2.34       |
| CP   | <i>S. filamentosa</i> | 45.38 $\pm$ 3.57       | 18.29 $\pm$ 0.27       | 1270.91 $\pm$ 59.31    | 110.46 $\pm$ 3.43      | 13.53 $\pm$ 0.45       | 15.16 $\pm$ 1.16      | 29.42 $\pm$ 0.83       |
| SM   | <i>C. coelothrix</i>  | 22.3 $\pm$ 0.50        | 30.32 $\pm$ 2.75       | 1557.97 $\pm$ 124.28   | 88.80 $\pm$ 4.88       | 6.17 $\pm$ 0.41        | 17.32 $\pm$ 0.26      | 12.94 $\pm$ 1.55       |
| SM   | <i>C. compressa</i>   | 0.92 $\pm$ 0.04        | 3.16 $\pm$ 0.06        | 74.44 $\pm$ 13.45      | 2.11 $\pm$ 0.15        | 1.67 $\pm$ 0.38        | 0.72 $\pm$ 0.18       | 3.23 $\pm$ 0.97        |
| SM   | <i>D. spiralis</i>    | 0.61 $\pm$ 0.18        | 3.23 $\pm$ 0.14        | 167.90 $\pm$ 5.25      | 5.24 $\pm$ 0.18        | 1.92 $\pm$ 0.17        | 3.17 $\pm$ 0.15       | 4.11 $\pm$ 0.15        |
| SM   | <i>J. rubens</i>      | < 0.01                 | 0.18 $\pm$ 0.31        | 48.70 $\pm$ 4.28       | 21.61 $\pm$ 1.75       | 2.41 $\pm$ 0.31        | 2.06 $\pm$ 0.49       | 28.09 $\pm$ 3.75       |
| SM   | <i>L. microcladia</i> | 0.63 $\pm$ 0.17        | 15.82 $\pm$ 0.41       | 158.07 $\pm$ 4.05      | 56.50 $\pm$ 1.90       | 9.07 $\pm$ 0.29        | 10.65 $\pm$ 0.28      | 56.11 $\pm$ 11.02      |
| SM   | <i>P. oceanica</i>    | 0.79 $\pm$ 0.19        | 50.8 $\pm$ 0.95        | 253.26 $\pm$ 31.12     | 62.34 $\pm$ 1.89       | 30.82 $\pm$ 1.19       | 1.19 $\pm$ 0.26       | 52.83 $\pm$ 4.63       |
| SM   | <i>T. atomaria</i>    | 3.29 $\pm$ 0.43        | 4.86 $\pm$ 0.39        | 342.04 $\pm$ 97.42     | 5.77 $\pm$ 1.22        | 3.59 $\pm$ 0.26        | 1.67 $\pm$ 0.37       | 6.43 $\pm$ 1.02        |
| OM   | <i>C. spinosa</i>     | 2.62 $\pm$ 0.31        | 5.83 $\pm$ 0.48        | 390.78 $\pm$ 32.80     | 21.56 $\pm$ 0.70       | 5.90 $\pm$ 0.27        | 4.92 $\pm$ 0.53       | 6.30 $\pm$ 0.08        |
| OM   | <i>J. rubens</i>      | < 0.01                 | 4.43 $\pm$ 0.19        | 138.24 $\pm$ 42.21     | 33.80 $\pm$ 4.74       | 2.71 $\pm$ 0.77        | 4.47 $\pm$ 0.59       | 12.69 $\pm$ 0.88       |
| OM   | <i>L. microcladia</i> | 0.62 $\pm$ 0.06        | 9.79 $\pm$ 1.27        | 263.46 $\pm$ 33.47     | 11.39 $\pm$ 1.39       | 6.41 $\pm$ 0.78        | 4.89 $\pm$ 0.50       | 14.31 $\pm$ 0.17       |
| OM   | <i>P. oceanica</i>    | 0.88 $\pm$ 0.63        | 35.21 $\pm$ 1.76       | 210.08 $\pm$ 40.51     | 73.65 $\pm$ 1.89       | 21.03 $\pm$ 0.44       | 0.75 $\pm$ 0.01       | 49.9 $\pm$ 3.03        |

**Table S3.** Non-essential element concentrations (mean values  $\pm$  standard deviations), expressed on a dry weight basis, in the analyzed macrophytes collected from the different sites of the study area (AH: Agropoli Harbor, TB: Trentova Bay, CT: Cape Tresino, CP: Cape Pagliarolo, SM: San Marco, OM: Ogliastro Marina).

| Site | Species               | Cd ( $\mu\text{g/g}$ ) | Pb ( $\mu\text{g/g}$ ) |
|------|-----------------------|------------------------|------------------------|
| AH   | <i>C. elongata</i>    | $0.04 \pm 0.01$        | $< 0.08$               |
| AH   | <i>D. spiralis</i>    | $0.58 \pm 0.06$        | $9.79 \pm 0.44$        |
| AH   | <i>P. oceanica</i>    | $1.74 \pm 0.06$        | $2.12 \pm 0.01$        |
| AH   | <i>U. compressa</i>   | $0.03 \pm 0.01$        | $0.28 \pm 0.27$        |
| TB   | <i>C. elongata</i>    | $0.10 \pm 0.01$        | $0.67 \pm 0.01$        |
| TB   | <i>D. spiralis</i>    | $0.08 \pm 0.02$        | $0.57 \pm 0.10$        |
| TB   | <i>H. virgatum</i>    | $0.14 \pm 0.01$        | $1.12 \pm 0.18$        |
| TB   | <i>J. rubens</i>      | $0.28 \pm 0.01$        | $0.64 \pm 0.26$        |
| TB   | <i>P. oceanica</i>    | $2.34 \pm 0.05$        | $4.43 \pm 0.28$        |
| TB   | <i>U. clathrata</i>   | $0.06 \pm 0.01$        | $2.52 \pm 0.50$        |
| CT   | <i>C. aerea</i>       | $0.04 \pm 0.01$        | $0.66 \pm 0.17$        |
| CT   | <i>C. elongata</i>    | $0.14 \pm 0.01$        | $0.24 \pm 0.04$        |
| CT   | <i>C. compressa</i>   | $1.67 \pm 0.46$        | $0.30 \pm 0.01$        |
| CT   | <i>C. crinita</i>     | $0.12 \pm 0.01$        | $1.28 \pm 0.20$        |
| CT   | <i>D. spiralis</i>    | $0.11 \pm 0.02$        | $1.39 \pm 0.20$        |
| CT   | <i>L. microcladia</i> | $0.20 \pm 0.02$        | $0.78 \pm 0.15$        |
| CT   | <i>L. obtusa</i>      | $0.21 \pm 0.01$        | $1.89 \pm 0.20$        |
| CT   | <i>P. oceanica</i>    | $1.75 \pm 0.11$        | $0.45 \pm 0.12$        |
| CP   | <i>C. elongata</i>    | $0.10 \pm 0.01$        | $0.31 \pm 0.03$        |
| CP   | <i>C. balearica</i>   | $0.22 \pm 0.02$        | $2.05 \pm 0.08$        |
| CP   | <i>C. compressa</i>   | $0.91 \pm 0.05$        | $< 0.08$               |
| CP   | <i>D. spiralis</i>    | $0.16 \pm 0.01$        | $0.72 \pm 0.12$        |
| CP   | <i>J. rubens</i>      | $0.23 \pm 0.02$        | $1.63 \pm 0.26$        |
| CP   | <i>L. microcladia</i> | $0.17 \pm 0.01$        | $1.18 \pm 0.19$        |
| CP   | <i>P. oceanica</i>    | $2.15 \pm 0.12$        | $4.27 \pm 0.31$        |
| CP   | <i>S. filamentosa</i> | $0.50 \pm 0.01$        | $7.30 \pm 0.37$        |
| SM   | <i>C. coelothrix</i>  | $0.08 \pm 0.01$        | $11.76 \pm 0.50$       |
| SM   | <i>C. compressa</i>   | $0.51 \pm 0.03$        | $< 0.08$               |
| SM   | <i>D. spiralis</i>    | $0.05 \pm 0.01$        | $0.43 \pm 0.03$        |
| SM   | <i>J. rubens</i>      | $0.14 \pm 0.05$        | $2.22 \pm 0.10$        |
| SM   | <i>L. microcladia</i> | $0.22 \pm 0.01$        | $2.59 \pm 0.06$        |
| SM   | <i>P. oceanica</i>    | $1.65 \pm 0.08$        | $0.88 \pm 0.08$        |
| SM   | <i>T. atomaria</i>    | $0.10 \pm 0.01$        | $0.54 \pm 0.06$        |
| OM   | <i>C. spinosa</i>     | $0.15 \pm 0.03$        | $1.90 \pm 0.18$        |
| OM   | <i>J. rubens</i>      | $0.22 \pm 0.01$        | $1.62 \pm 0.43$        |
| OM   | <i>L. microcladia</i> | $0.20 \pm 0.01$        | $0.51 \pm 0.13$        |
| OM   | <i>P. oceanica</i>    | $1.30 \pm 0.06$        | $1.97 \pm 0.16$        |
